# Supplementary material
Source: publisher figshare collection journal article supplement (https://acs.figshare.com/ndownloader/files/16334921)
Supplement: Supplementary file 1 [file 16334921]

## Electronic Supplementary Information (ESI)

### Chemical Effect of Halide Ligands on the Electromechanical Properties of Ag Nanocrystal Thin Films for Wearable Sensors

Junhyuk Ahn,<sup>a1</sup> Sanghyun jeon,<sup>a</sup> Woo Seok Lee,<sup>a</sup> Ho Kun Woo,<sup>a</sup> Donggyu Kim,<sup>b</sup> Junsung Bang,<sup>a</sup> and Soong Ju Oh\*<sup>a</sup>

---

<sup>a</sup>Department of Materials Science and Engineering, Korea University, 145, Anam-ro Seongbuk-gu Seoul, 02841, Republic of Korea.

<sup>b</sup>Department of Semiconductor Systems Engineering, Korea University, 145, Anam-ro Seongbuk-gu Seoul, 02841, Republic of Korea.

email: \* sjoh1982@korea.ac.kr

| Ag NCs treated with     | TBAC ( $\text{Cl}^-$ ) | TBAB ( $\text{Br}^-$ ) | TBAI ( $\text{I}^-$ ) |
|-------------------------|------------------------|------------------------|-----------------------|
| Silver (At%)            | 9.67                   | 14.46                  | 9.41                  |
| Halide (At%)            | 1                      | 1.71                   | 1.27                  |
| Halide At% / Silver At% | 0.1                    | 0.12                   | 0.13                  |

Table S1 Atomic ratios of halides and Ag.

| TBAI-treated Ag NCs     | 60 s  | 30 s  | 10 s  |
|-------------------------|-------|-------|-------|
| Ag (wt%)                | 27.53 | 31.69 | 29.83 |
| I (wt%)                 | 4.39  | 4.73  | 4.88  |
| Iodine wt% / Silver wt% | 0.16  | 0.15  | 0.16  |

Table S2 Ratios of weight percentages of halides and Ag time corresponding to the substitution time

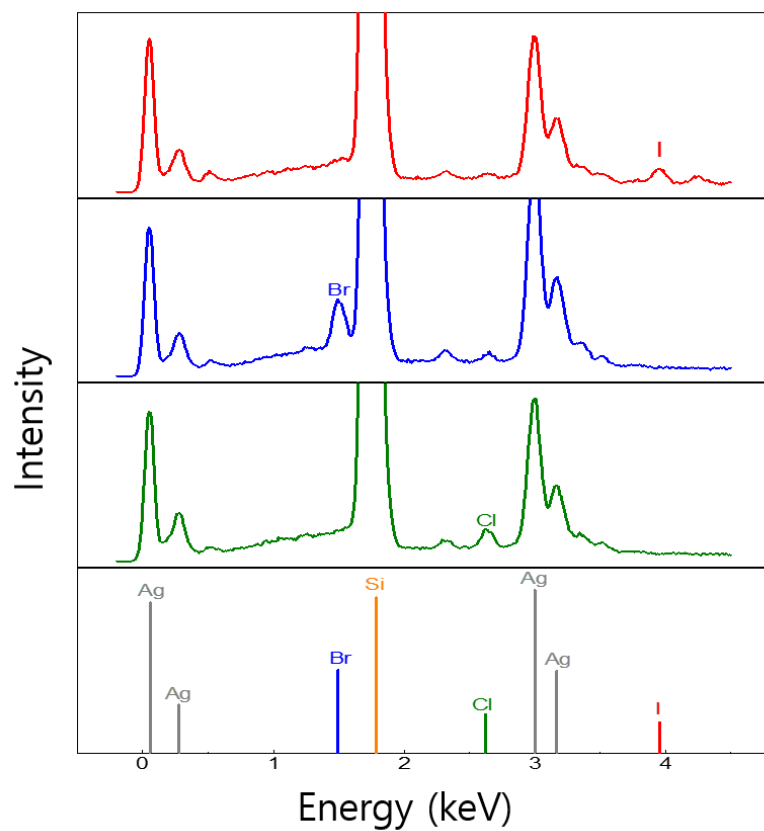

Figure S1. EDS profiles of halide-ligand-treated Ag NC thin films: I (red), Br (blue), and Cl (green).

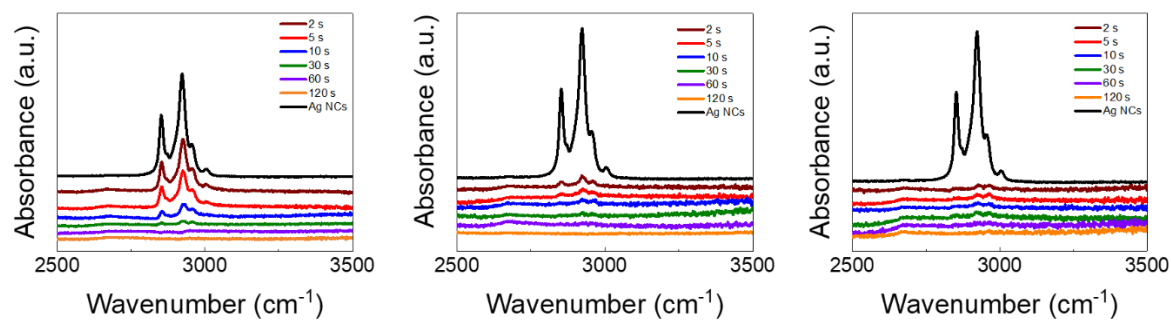

Figure S2. FTIR spectra of TBAC-treated (left), TBAB-treated (middle), and TBAI-treated (right) Ag NC thin films.

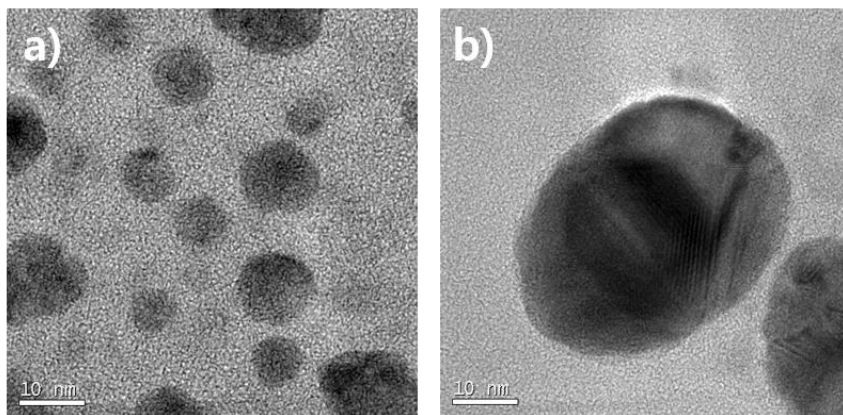

Figure S3. Ag NCs treated with TBAC for (a) 5 s and (b) 5 m.

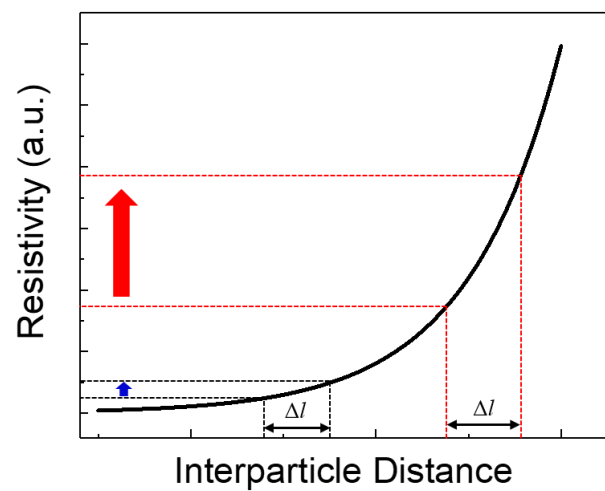

Figure S4. Graph of change in resistivity depending on change in interparticle distance

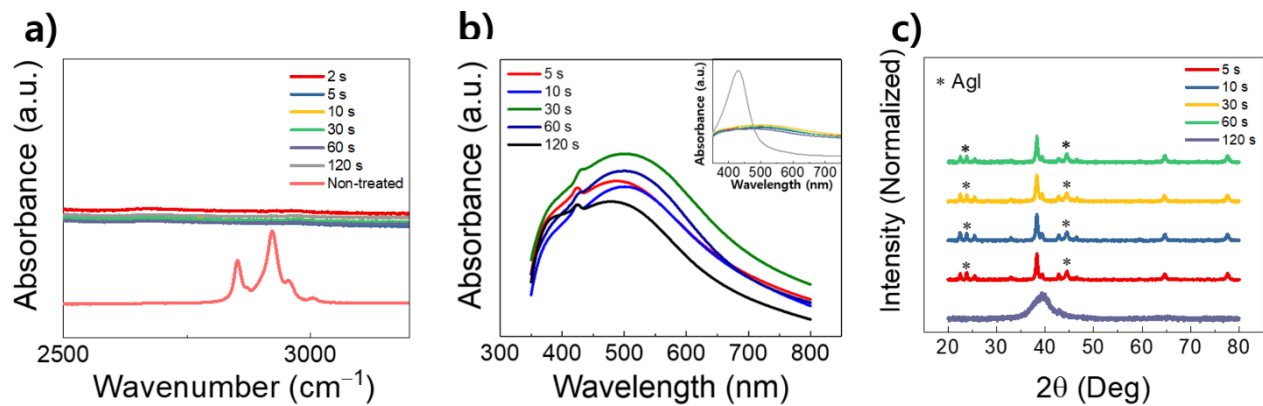

Figure S5. (a) FTIR and (b) UV-Vis absorption spectra; inset is comparison between as-synthesized peak (the highest, black line) and TBAI-treated Ag NC thin films peaks, and (c) XRD patterns of Ag NC thin films treated with TBAI for different times.

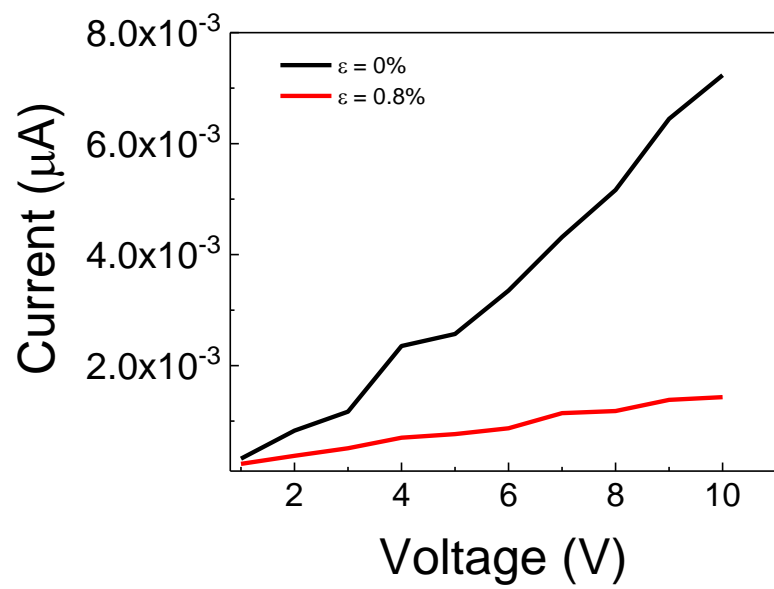

Figure S6. *I*-*V* curve of TBAI-treated Ag NC thin films under 0% and 0.8 % strain.



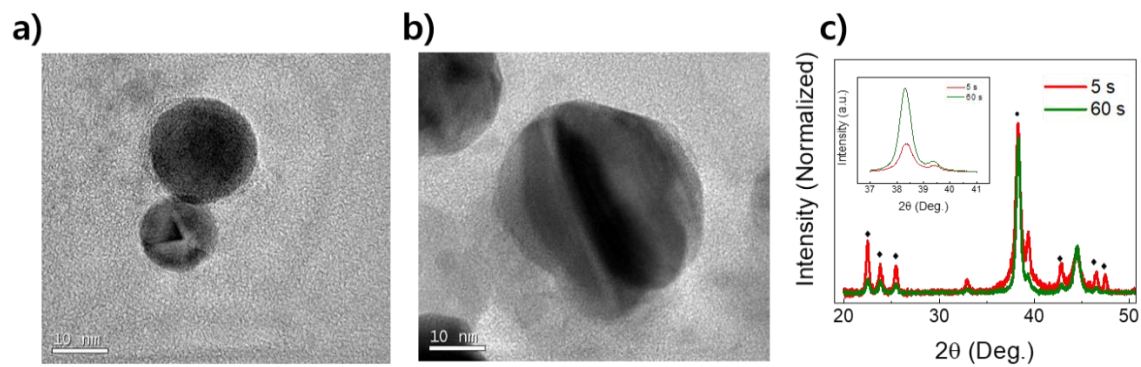

Figure S7. TEM images of TBAI-treated Ag NCs for (a) 5 s and (b) 60 s. (c) XRD spectra of TBAI-treated Ag NCs for 5 s (red line) and 6 s (green line).
